# Supplementary material for: Distribution of high valence Fe sites in nickel–iron hydroxide catalysts for water oxidation
Source: Royal Society of Chemistry journal article supplement (doi:10.1039/d3ta06632k), 2023-12-27
Supplement: d3ta06632k1.pdf [file d3ta06632k1.pdf]

## Supporting Information

### **Distribution of high valence Fe active sites in nickel-iron hydroxide catalysts for water oxidation**

Peijia Ding<sup>a</sup>, Qi Hu<sup>\*a,b</sup>, Ziwei Chai<sup>c</sup>, Hong-Bo Zhou<sup>a</sup>, Guang-Hong Lu<sup>a</sup>, Gilberto Teobaldi<sup>d</sup>, Annabella Selloni<sup>\*e</sup> and Li-Min Liu<sup>\*a</sup>

<sup>a</sup> School of Physics, Beihang University, Beijing 100191, China

<sup>b</sup> School of Chemistry, Beihang University, Beijing 100191, China

<sup>c</sup> Department of Chemistry, University of Zurich, Zurich, Switzerland

<sup>d</sup> Scientific Computing Department, STFC UKRI, Rutherford Appleton Laboratory, Harwell Campus, OX11 0QX Didcot, United Kingdom

<sup>e</sup> Department of Chemistry, Princeton University, Princeton, NJ 08544, USA

Email: liminliu@buaa.edu.cn; huqi@buaa.edu.cn; aselloni@princeton.edu

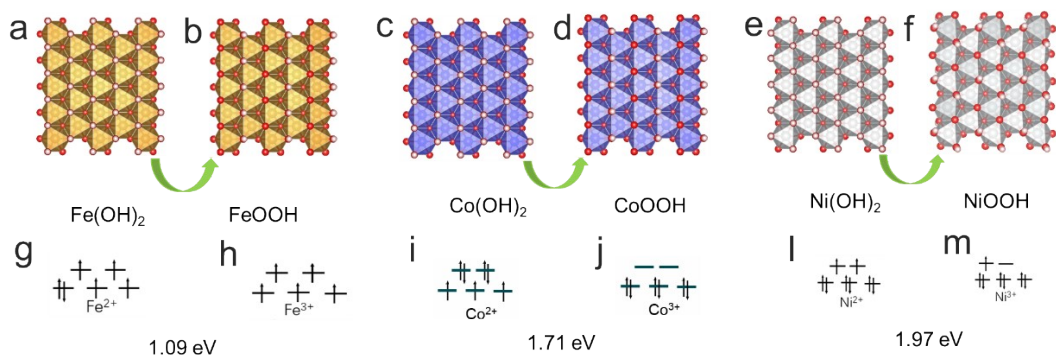

**Fig. S1.** Structures of  $M(\text{OH})_2$  and  $\text{MOOH}$  ( $M=\text{Fe, Co, Ni}$ ). (a-f). Top views of  $\text{Fe}(\text{OH})_2$ ,  $\text{FeOOH}$ ,  $\text{Co}(\text{OH})_2$ ,  $\text{CoOOH}$ ,  $\text{Ni}(\text{OH})_2$  and  $\text{NiOOH}$ , respectively. (g-m) Electronic d orbital occupancies of metal ions in (a-f).

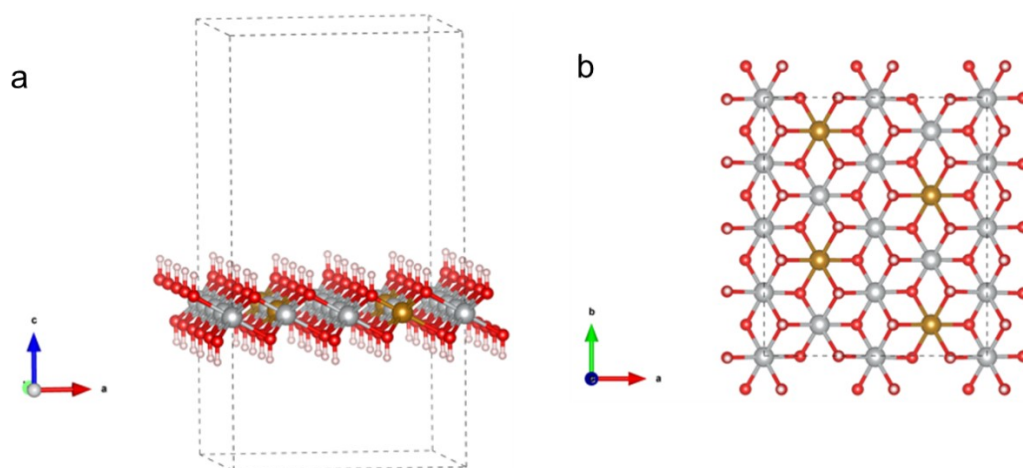

**Fig. S2.** Single-layer 25% Fe doped NiFe hydroxide,  $\text{Ni}_{3/4}\text{Fe}_{1/4}(\text{OH})_2$ , model used for the calculations: (a) viewed from the side; (b) viewed from above the surface. Grey, red, pinky white and brown balls represent Ni, O, H and Fe atoms, respectively.

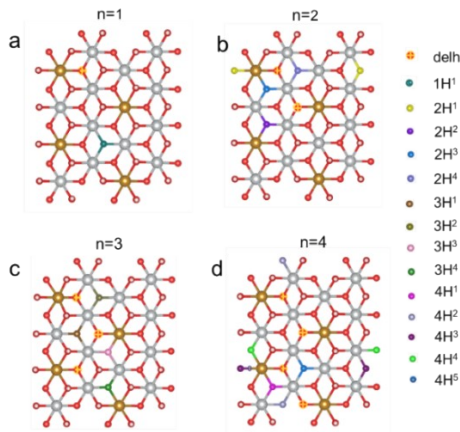

**Fig. S3.** (a-d) The investigated hydrogen desorption sites for  $\text{Ni}_{3/4}\text{Fe}_{1/4}(\text{OH})_2$  in the first stage of the dehydrogenation process ( $n=1-4$ ). The different colors indicate different  $n\text{H}^x$  ( $n=1-4$ ;  $x=1-5$ ) dehydrogenation sites, as shown by the small balls on the right. Here,  $n$  represents the number of desorbed H, and  $x$  labels different desorption sites for the same  $n$ . The grey, pinky white, brown and red balls represent the Ni, H, Fe and O atoms, respectively.

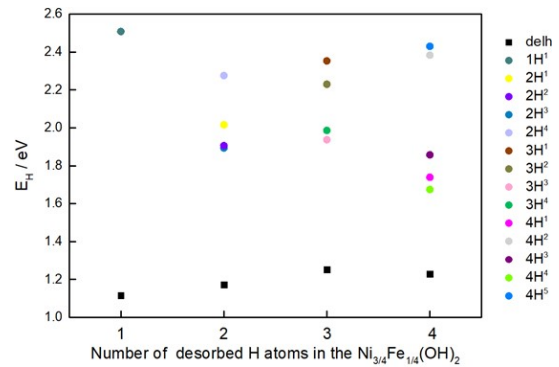

**Fig. S4.** Desorption energies  $E_H$  of different sites in  $\text{Ni}_{3/4}\text{Fe}_{1/4}(\text{OH})_2$  during the dehydrogenation ( $n=1-4$ ). Black symbols represent the best site. The colors indicate the different dehydrogenation sites shown in Fig. S3.

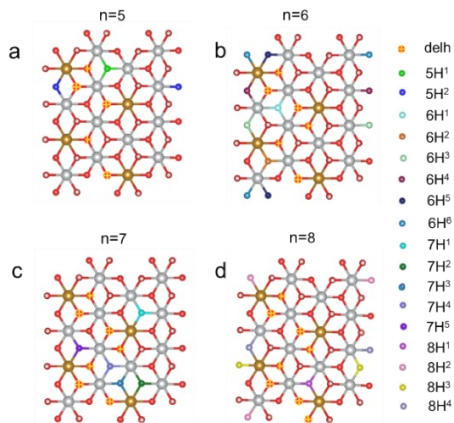

**Fig. S5.** (a-d) The investigated hydrogen desorption sites of  $\text{Ni}_{3/4}\text{Fe}_{1/4}(\text{OH})_2$  during the dehydrogenation process ( $n=5-8$ ). The different colors indicate different dehydrogenation sites.

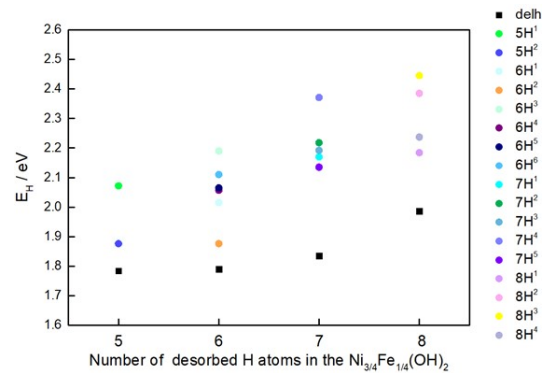

**Fig. S6.** Desorption energies  $E_H$  of different sites in  $\text{Ni}_{3/4}\text{Fe}_{1/4}(\text{OH})_2$  during the second stage of dehydrogenation ( $n=5-8$ ). Black symbols represent the most favorable site. The different colors correspond to the different dehydrogenation sites shown in Fig. S5.

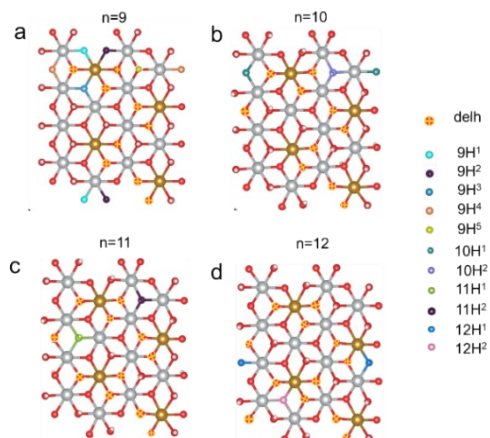

**Fig. S7.** (a-d) The investigated hydrogen desorption sites of  $\text{Ni}_{3/4}\text{Fe}_{1/4}(\text{OH})_2$  during the dehydrogenation process ( $n=9-12$ ). The different colors indicate different dehydrogenation sites.

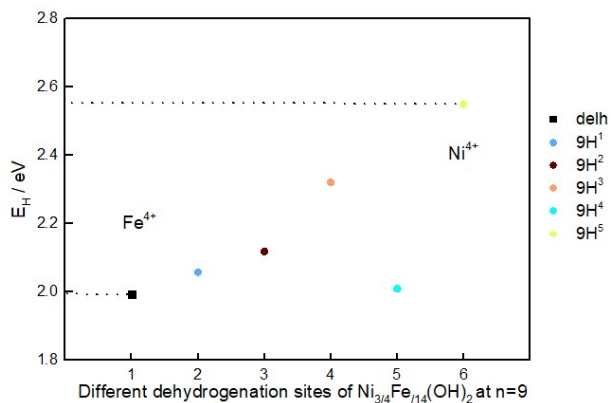

**Fig. S8.** Desorption energies  $E_H$  of different sites in  $\text{Ni}_{3/4}\text{Fe}_{1/4}(\text{OH})_2$  ( $n=9$ ). Black symbols represent the most favorable site. The different colors indicate the different dehydrogenation sites as shown in **Fig. S7**.  $\text{Fe}^{4+}$  and  $\text{Ni}^{4+}$  represent the electronic state of black label and olivine label respectively.

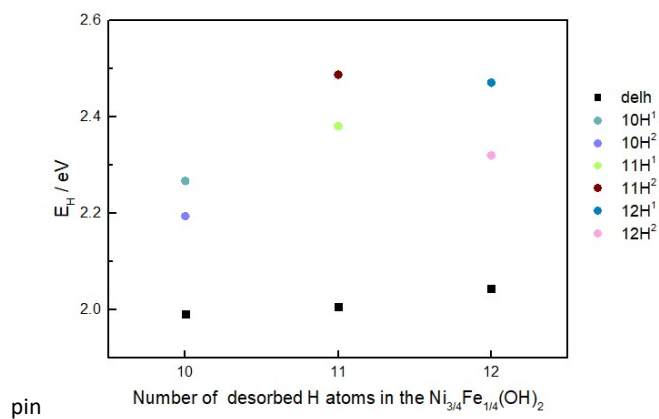

**Fig. S9.** Desorption energies  $E_H$  of different sites in  $\text{Ni}_{3/4}\text{Fe}_{1/4}(\text{OH})_2$  ( $n=10-12$ ). Black symbols represent the most favorable site. The different colors indicate the different dehydrogenation sites as shown in **Fig. S7**.  $\text{Fe}^{4+}$  and  $\text{Ni}^{4+}$  represent the electronic state of black label and purple label respectively.

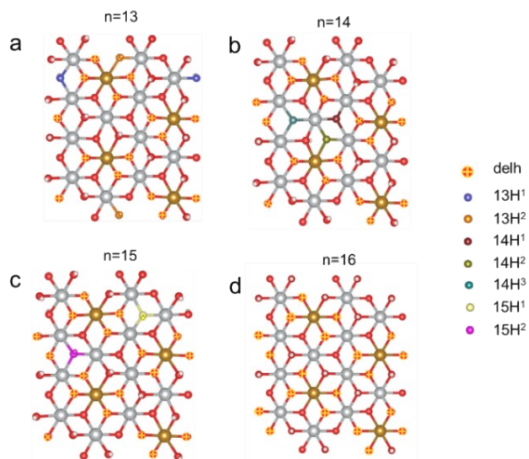

**Fig. S10. (a-d)** The investigated hydrogen desorption sites of  $\text{Ni}_{3/4}\text{Fe}_{1/4}(\text{OH})_2$  during the dehydrogenation process ( $n=13-16$ ). The different colors indicate different dehydrogenation sites.

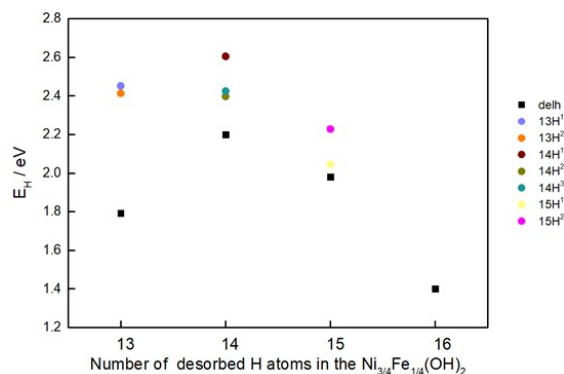

**Fig. S11.** Desorption energies  $E_H$  of different sites in  $\text{Ni}_{3/4}\text{Fe}_{1/4}(\text{OH})_2$  ( $n=13-16$ ). Black symbols represent the most favorable site. The different colors indicate the different dehydrogenation sites as shown in **Fig. S10**.  $\text{Fe}^{4+}$  and  $\text{Ni}^{4+}$  represent the electronic state of black label and purple label respectively.

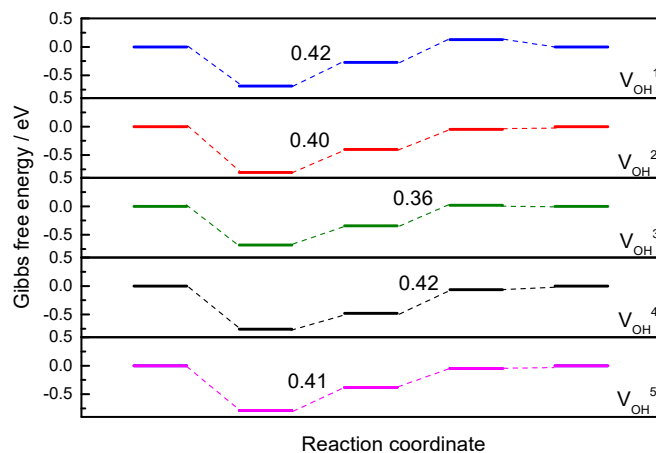

**Fig. S12.** Calculated OER free energy profiles for the  $V_{\text{OH}}^1$ ,  $V_{\text{OH}}^2$ ,  $V_{\text{OH}}^3$ ,  $V_{\text{OH}}^4$  and  $V_{\text{OH}}^5$  sites in  $\text{Ni}_{12}\text{Fe}_4\text{O}_{32}\text{H}_{18}$  ( $n=14$ ) that are at the top of the volcano plot in **Fig. 4a** of the main text. The reported value in each plot indicates the corresponding OER overpotential (in eV).

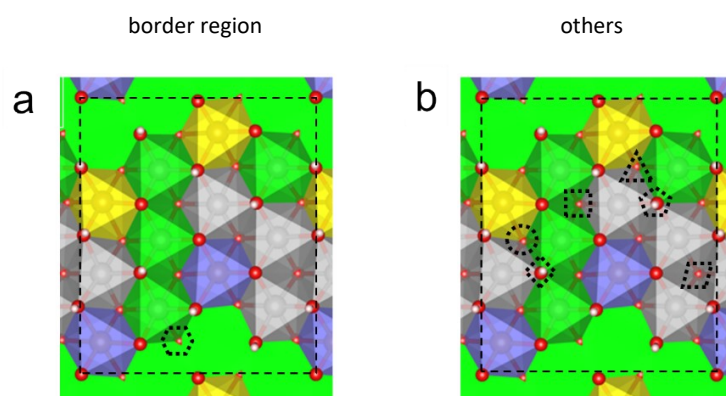

**Fig. S13.** Locations of the investigated  $V_{OH}$  reactive sites in  $Ni_{12}Fe_4O_{32}H_{18}$  ( $n=14$ ), in addition to those shown in Fig. 4b: (a) site at the border of the  $Ni^{3+}$  region between  $Fe^{3+}$  and  $Fe^{4+}$ ; (b) sites in non-border region. Green, yellow, purple and grey polyhedral represent  $Ni^{3+}$ ,  $Fe^{3+}$ ,  $Fe^{4+}$  and  $Ni^{2+}$ , respectively. Green area:  $Ni^{3+}$  region between  $Fe^{3+}$  and  $Fe^{4+}$ .

**Table S1.** Average dehydrogenation energy  $E_H$  for the transformation of  $M(OH)_2$  to  $MOOH$  ( $M=Fe, Co, Ni$ ), obtained from PBE+U calculations.

| Struct.             | Total energy / eV | $\Delta E_H$ / eV |
|---------------------|-------------------|-------------------|
| Fe(OH) <sub>2</sub> | -458.18           |                   |
| FeOOH               | -387.02           | 1.09              |
| Co(OH) <sub>2</sub> | -428.08           |                   |
| CoOOH               | -347.17           | 1.71              |
| Ni(OH) <sub>2</sub> | -395.77           |                   |
| NiOOH               | -310.73           | 1.96              |

**Table S2.** Computed (PBE+U) energies of  $\text{Ni}_{3/4}\text{Fe}_{1/4}\text{OOH}$  configurations with different H distributions.

| Hydrogen Distribution in $\text{Ni}_{3/4}\text{Fe}_{1/4}\text{OOH}$                | Energy / eV | $\Delta E$ / eV |
|------------------------------------------------------------------------------------|-------------|-----------------|
| Same as in $\text{NiOOH-U}^{11}$                                                   | -329.25     | 0.00            |
| From step-by-step dehydrogenation of $\text{Ni}_{3/4}\text{Fe}_{1/4}(\text{OH})_2$ | -329.59     | -0.34           |

**Table S3.** Calculated (PBE+U) total energy E, zero-point energy (ZPE) and room temperature. entropy correction (TS) for gas phase  $\text{H}_2$  and  $\text{H}_2\text{O}$ . All values are in eV.

|                      | E      | ZPE  | TS   | G / eV |
|----------------------|--------|------|------|--------|
| $\text{H}_2$         | -6.77  | 0.28 | 0.41 | -6.90  |
| $\text{H}_2\text{O}$ | -14.23 | 0.58 | 0.67 | -14.32 |

**Table S4.** Computed (PBE+U) energies of  $\text{Ni}_{3/4}\text{Fe}_{1/4}\text{OH}$  configurations at n=12 with different H distributions.

| Structure                                  | Total energy / eV | $\Delta E$ / eV |
|--------------------------------------------|-------------------|-----------------|
| Used in the text                           | -350.365          | 0.00            |
| 9H <sup>1</sup> -type ( $\text{Ni}^{3+}$ ) | -350.185          | 0.18            |

**Table S5.** Calculated (PBE+U) free energies of the four OER intermediates for the seven different  $V_{OH}$  reactive sites in  $Ni_{12}Fe_4O_{32}H_{18}$  ( $n=14$ ) that are shown in **Fig. S12**.

| Defect Types             | Reaction Step<br>(Formula)                 | Reactive<br>Site                                                                    | G-n*1.23/e<br>/ V | Overpotential<br>/ V | <input type="checkbox"/> |
|--------------------------|--------------------------------------------|-------------------------------------------------------------------------------------|-------------------|----------------------|--------------------------|
| <input type="checkbox"/> | * + 2H <sub>2</sub> O                      |    | 0.00              | 0.72                 | <input type="checkbox"/> |
|                          | *OH + H <sub>2</sub> O + 1/2H <sub>2</sub> |                                                                                     | -0.71             |                      |                          |
|                          | *O + H <sub>2</sub> O + H <sub>2</sub>     |                                                                                     | 0.00              |                      |                          |
|                          | *OOH + 3/2H <sub>2</sub>                   |                                                                                     | 0.10              |                      |                          |
|                          | * + O <sub>2</sub> + 2H <sub>2</sub>       |                                                                                     | 0.00              |                      |                          |
| others                   | * + 2H <sub>2</sub> O                      |    | 0.00              | 0.48                 | <input type="checkbox"/> |
|                          | *OH + H <sub>2</sub> O + 1/2H <sub>2</sub> |                                                                                     | -0.92             |                      |                          |
|                          | *O + H <sub>2</sub> O + H <sub>2</sub>     |                                                                                     | -0.43             |                      |                          |
|                          | *OOH + 3/2H <sub>2</sub>                   |                                                                                     | -0.24             |                      |                          |
|                          | * + O <sub>2</sub> + 2H <sub>2</sub>       |                                                                                     | 0.00              |                      |                          |
| <input type="checkbox"/> | * + 2H <sub>2</sub> O                      |    | 0.00              | 0.49                 | <input type="checkbox"/> |
|                          | *OH + H <sub>2</sub> O + 1/2H <sub>2</sub> |                                                                                     | -0.72             |                      |                          |
|                          | *O + H <sub>2</sub> O + H <sub>2</sub>     |                                                                                     | -0.23             |                      |                          |
|                          | *OOH + 3/2H <sub>2</sub>                   |                                                                                     | 0.16              |                      |                          |
|                          | * + O <sub>2</sub> + 2H <sub>2</sub>       |                                                                                     | 0.00              |                      |                          |
| border region            | * + 2H <sub>2</sub> O                      |  | 0.00              | 0.51                 | <input type="checkbox"/> |
|                          | *OH + H <sub>2</sub> O + 1/2H <sub>2</sub> |                                                                                     | -1.01             |                      |                          |
|                          | *O + H <sub>2</sub> O + H <sub>2</sub>     |                                                                                     | -0.77             |                      |                          |
|                          | *OOH + 3/2H <sub>2</sub>                   |                                                                                     | -0.25             |                      |                          |
|                          | * + O <sub>2</sub> + 2H <sub>2</sub>       |                                                                                     | 0.00              |                      |                          |
| <input type="checkbox"/> | * + 2H <sub>2</sub> O                      |  | 0.00              | 0.41                 | <input type="checkbox"/> |
|                          | *OH + H <sub>2</sub> O + 1/2H <sub>2</sub> |                                                                                     | -0.79             |                      |                          |
|                          | *O + H <sub>2</sub> O + H <sub>2</sub>     |                                                                                     | -0.38             |                      |                          |
|                          | *OOH + 3/2H <sub>2</sub>                   |                                                                                     | -0.05             |                      |                          |
|                          | * + O <sub>2</sub> + 2H <sub>2</sub>       |                                                                                     | 0.00              |                      |                          |
| others                   | * + 2H <sub>2</sub> O                      |  | 0.00              | 0.58                 | <input type="checkbox"/> |
|                          | *OH + H <sub>2</sub> O + 1/2H <sub>2</sub> |                                                                                     | -0.63             |                      |                          |
|                          | *O + H <sub>2</sub> O + H <sub>2</sub>     |                                                                                     | -0.05             |                      |                          |
|                          | *OOH + 3/2H <sub>2</sub>                   |                                                                                     | 0.20              |                      |                          |
|                          | * + O <sub>2</sub> + 2H <sub>2</sub>       |                                                                                     | 0.00              |                      |                          |
| <input type="checkbox"/> | * + 2H <sub>2</sub> O                      |  | 0.00              | 0.58                 | <input type="checkbox"/> |
|                          | *OH + H <sub>2</sub> O + 1/2H <sub>2</sub> |                                                                                     | -0.87             |                      |                          |
|                          | *O + H <sub>2</sub> O + H <sub>2</sub>     |                                                                                     | -0.58             |                      |                          |
|                          | *OOH + 3/2H <sub>2</sub>                   |                                                                                     | 0.00              |                      |                          |
|                          | * + O <sub>2</sub> + 2H <sub>2</sub>       |                                                                                     | 0.00              |                      |                          |
